# Supplementary material
Source: publisher figshare collection journal article supplement (https://tandf.figshare.com/ndownloader/files/14941817)
Supplement: Supplementary file 1 [file 14941817]

Response to reviewer’s comments

Page 1. Title. We have modified the title according to the reviewer’s suggestion.

Throughout the manuscript, we have removed “n. gen. et sp.” according to the reviewer’s suggestion.

Page 2. We have changed the term “palps” to “palpus or palpi” according to the reviewer’s suggestion.

Throughout the manuscript we have changed the term “bristles” to “setae”.

Throughout the manuscript we have changed MYA to Mya according to the reviewer’s suggestion.

On page 4, we have added a comma at line 22, a colon at line 33, capitalized “The” at line 42 and italicized “*prisco*” at lines 42-45. At line 49 and onto page 5, line 8, we use flagellomeres and palpomeres according to the reviewer’s suggestion.

On page 5, line 38 and onto page 6, line 34, we have made the suggested changes.

On page 6, we have removed some of the references regarding the characters of members of the Anophelini.

On page 7, lines 22 and 24, we have changed the venation to M1+2 and M3+4.

On page 7, line 31, we have removed the alignment section according to the reviewer’s suggestion.

On page 7, line 15, we disagree with the reviewer regarding the scutellum of *Chagasia* and have kept it trifid.

On page 7, line 31, the reviewer asks what we mean with the term “pebbling”. We have added that it means “small dots” on the wing surface.
